# Supplementary material for: Synthesis of New Star-Shaped Liquid Crystalline Cyclotriphosphazene Derivatives with Fire Retardancy Bearing Amide-Azo and Azo-Azo Linking Units
Source: MDPI journal article supplement (doi:10.3390/ijms21124267), 2020-06-16
Supplement: s1 [file s1]

# Supplementary Materials – DSC thermogram of compounds 6a–e and 8a–e

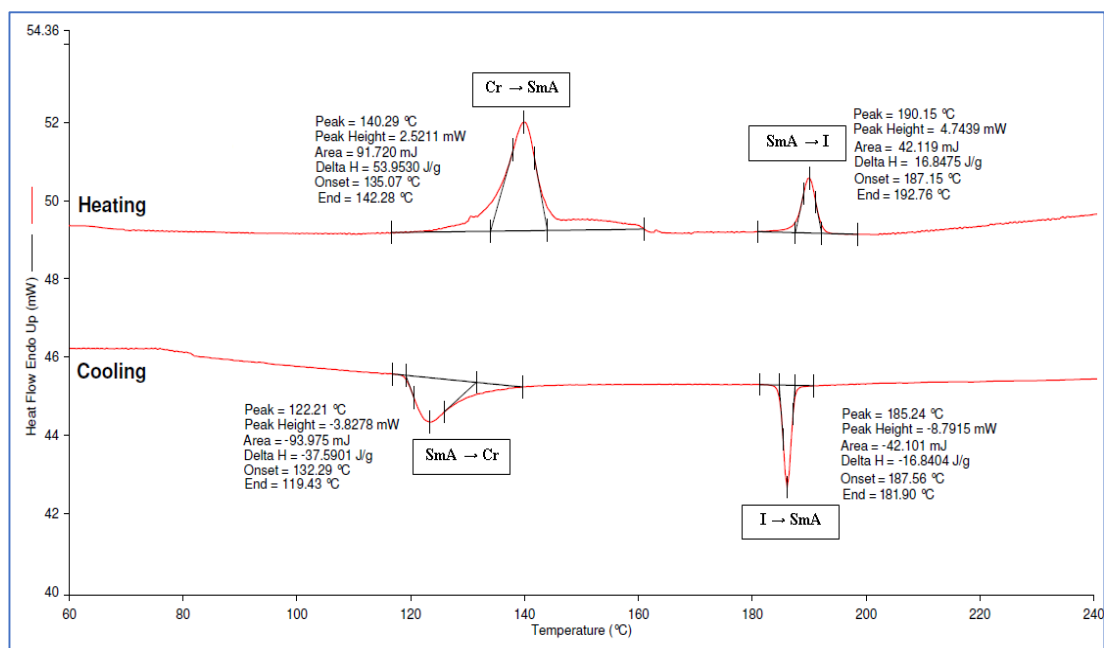

Figure S1. DSC thermogram of compound 6a.

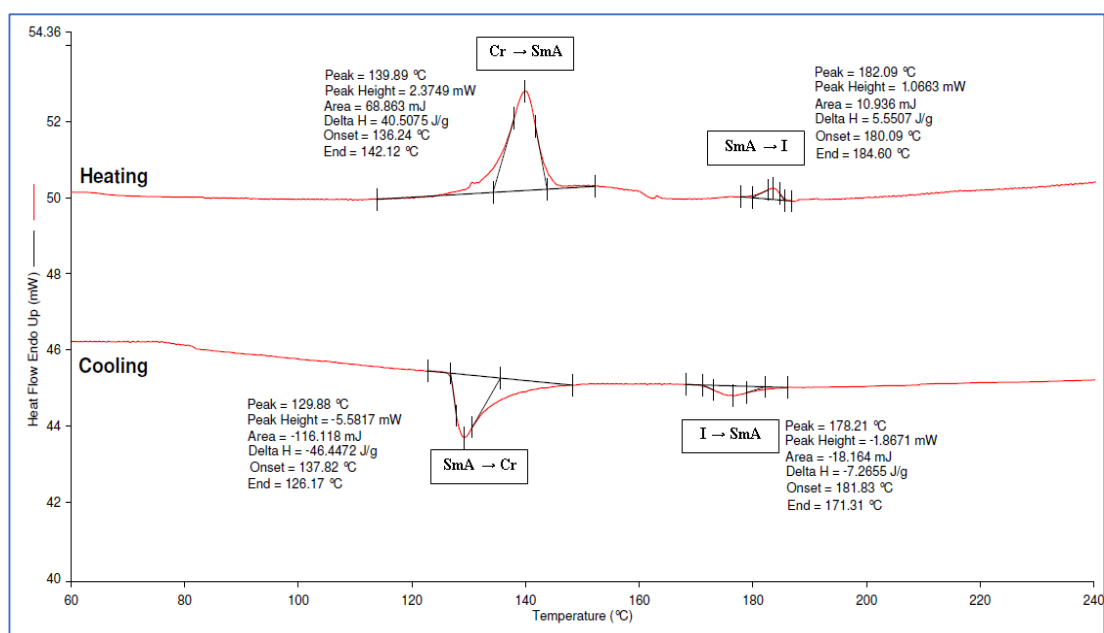

Figure S2. DSC thermogram of compound 6b.

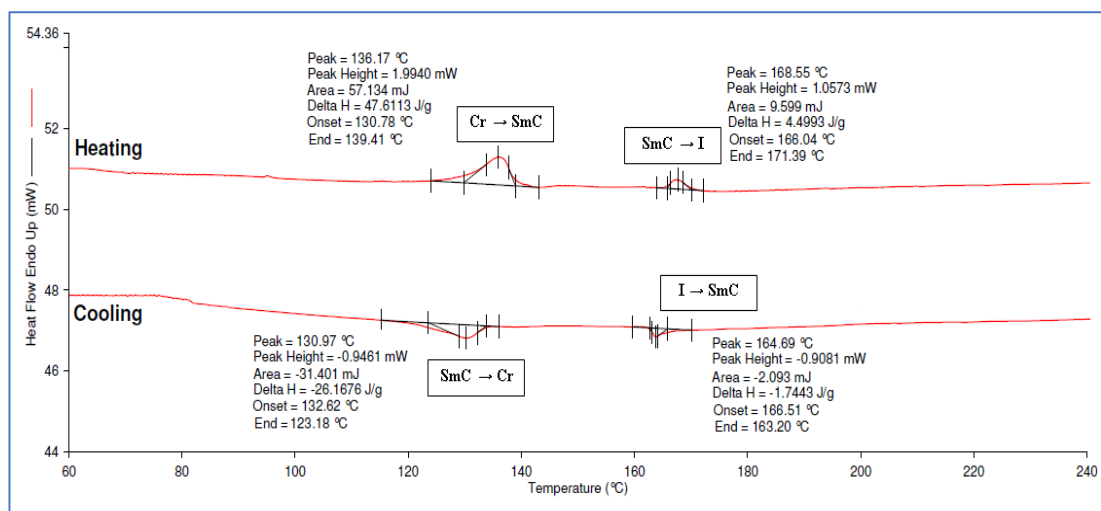

Figure S3. DSC thermogram of compound 6c.

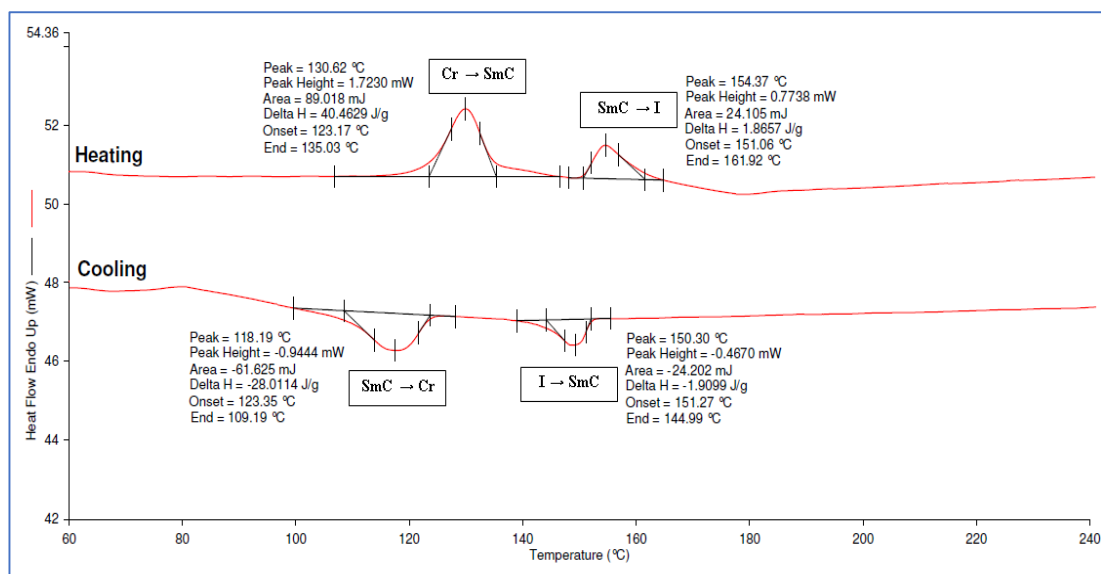

Figure S4. DSC thermogram of compound 6d.

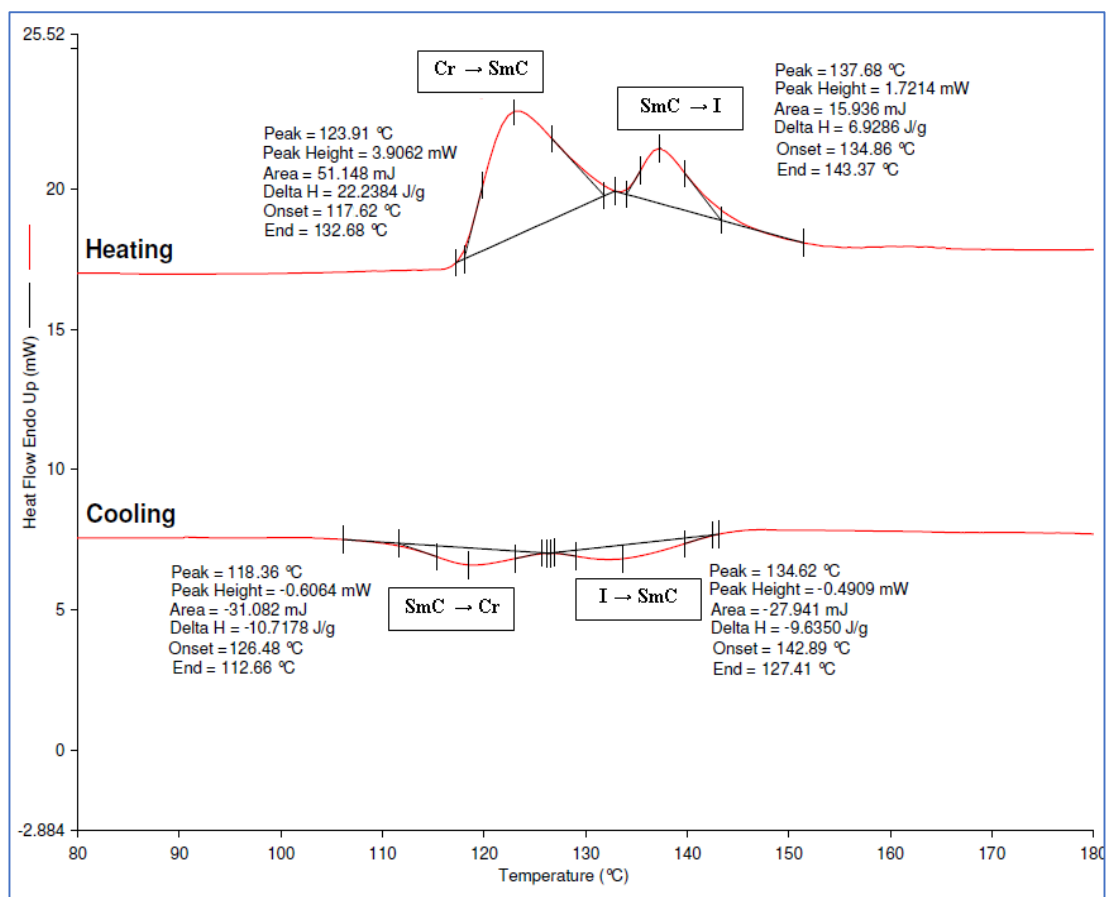

Figure S5. DSC thermogram of compound 6e.

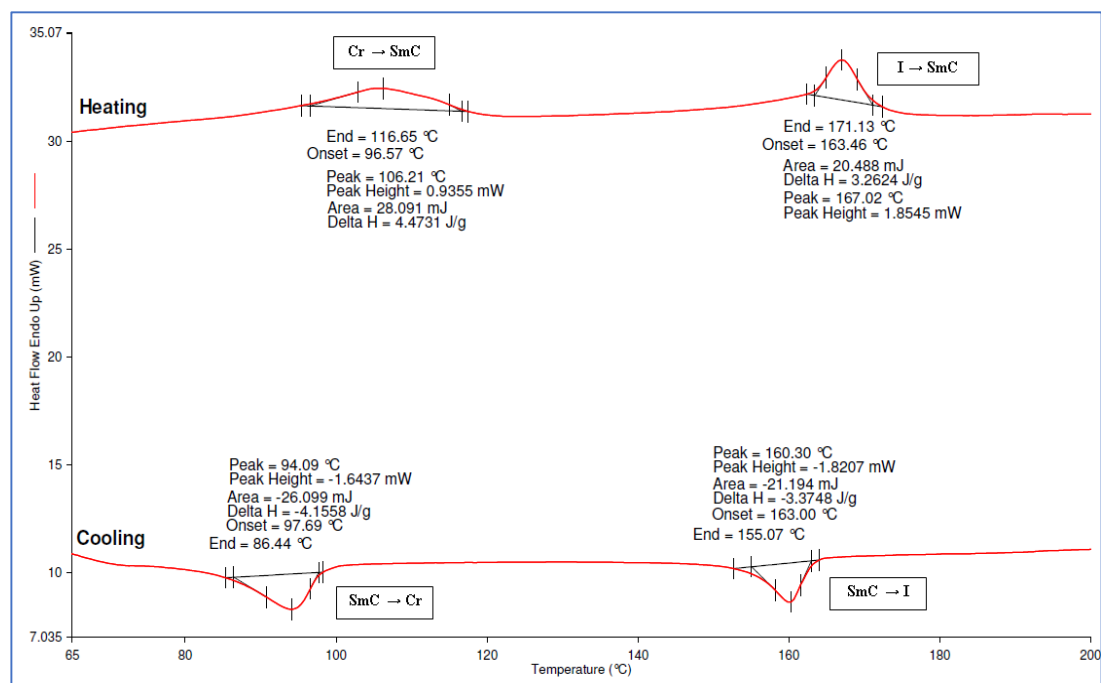

Figure S6. DSC thermogram of compound 8a.

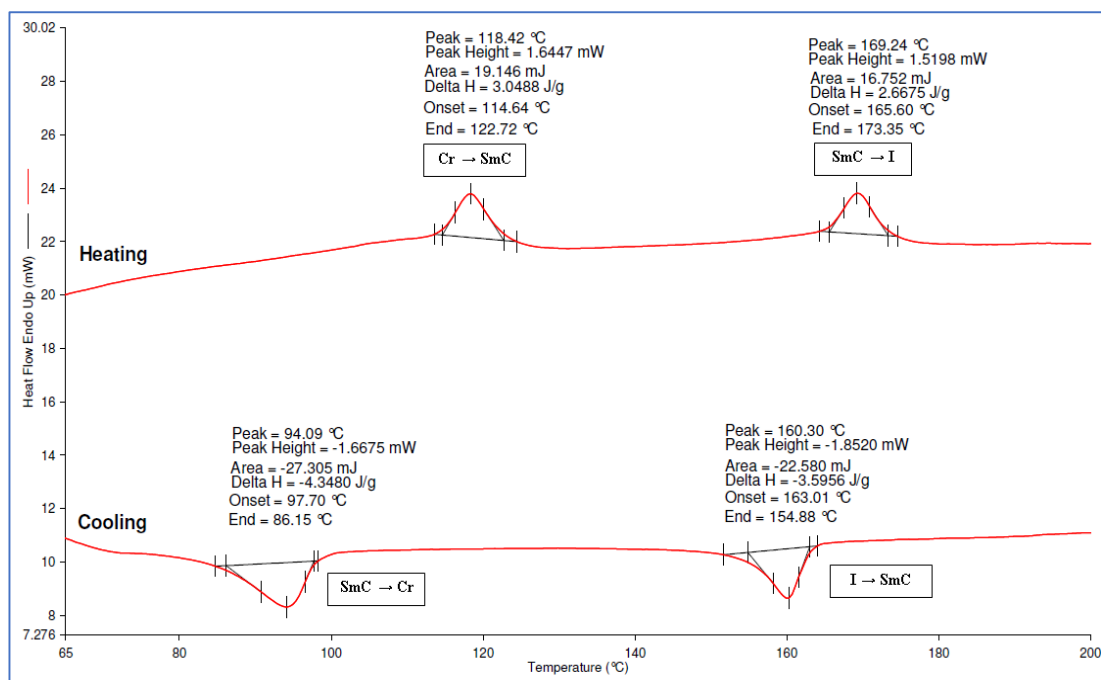

Figure S7. DSC thermogram of compound 8b.

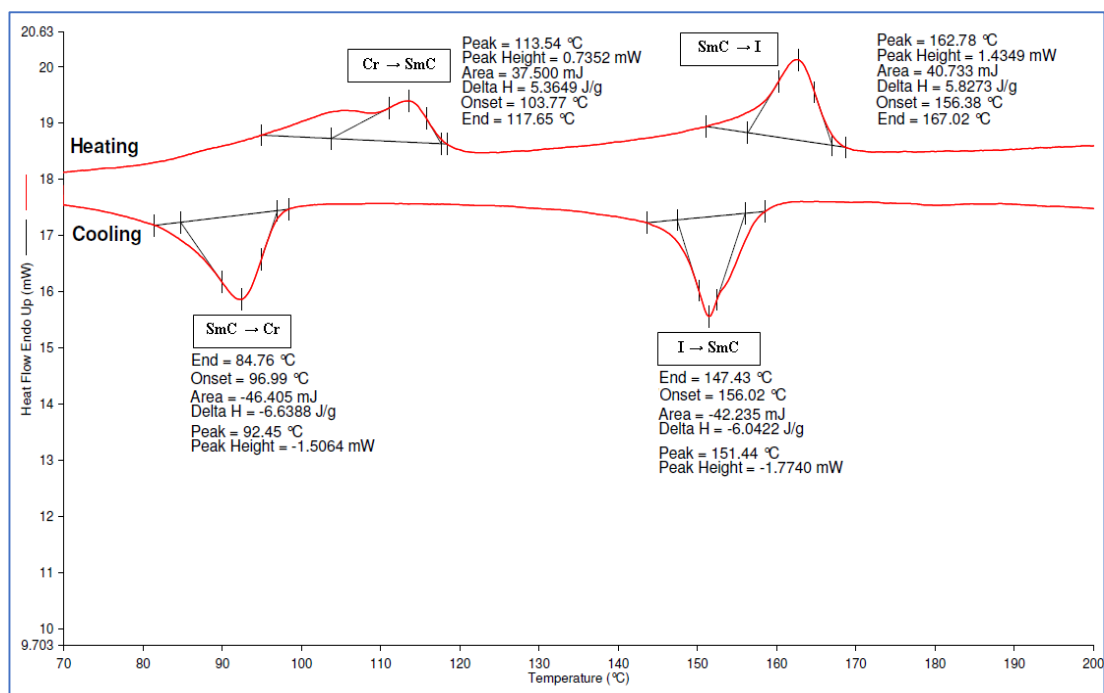

Figure S8. DSC thermogram of compound 8c.

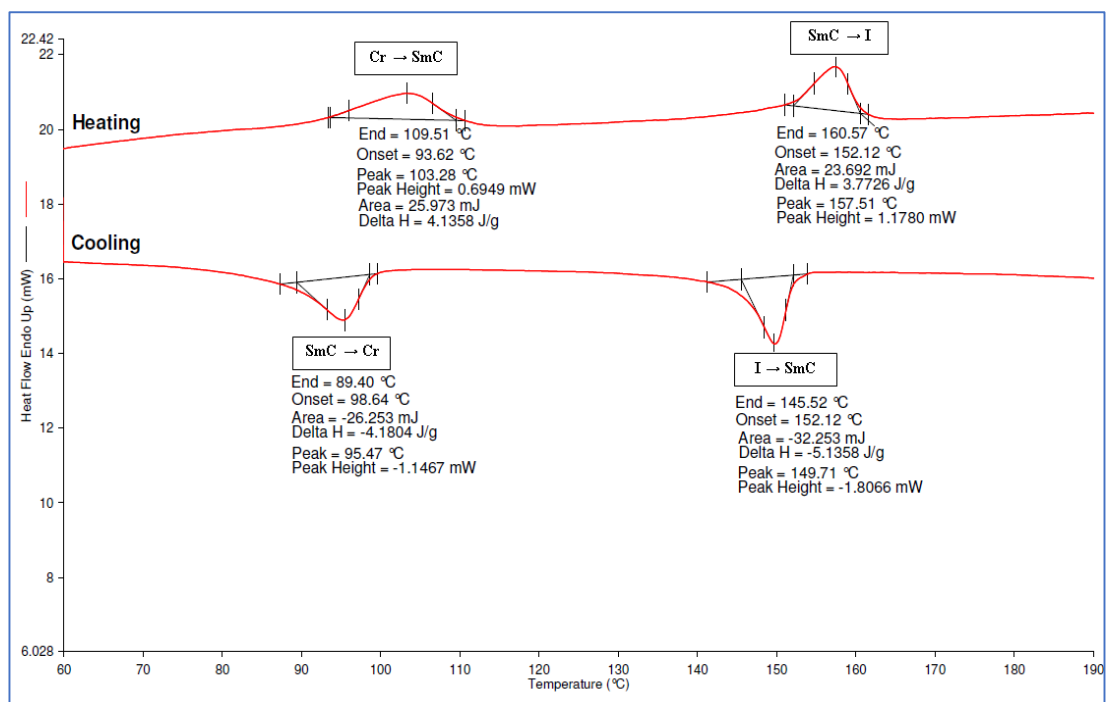

Figure S9. DSC thermogram of compound 8d.

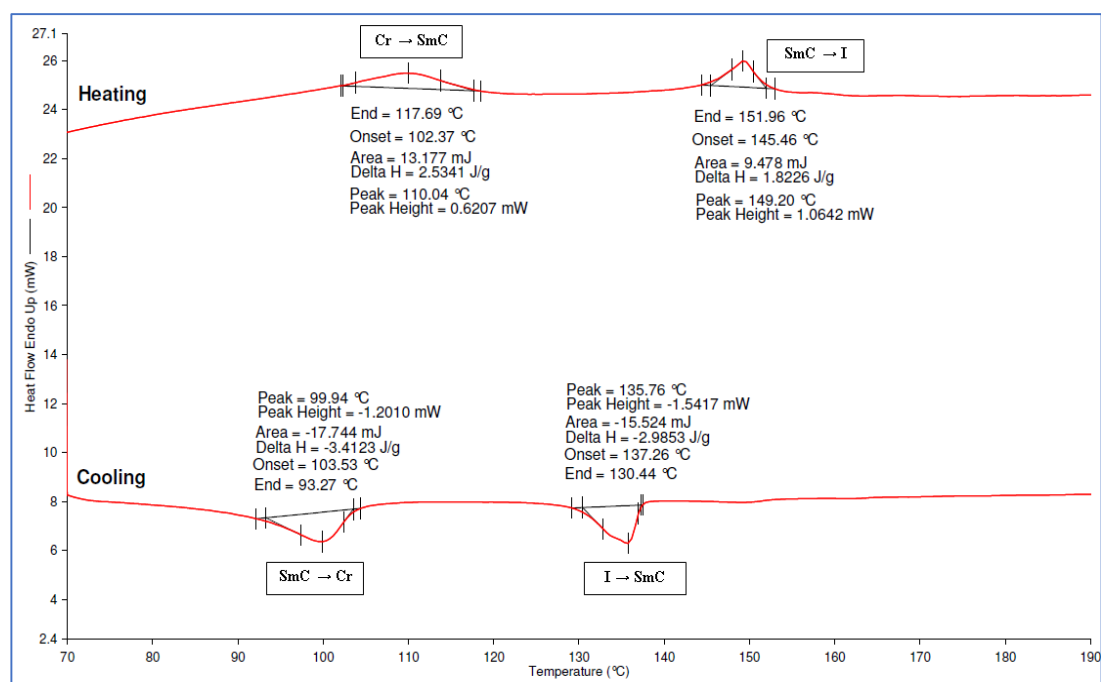

Figure S10. DSC thermogram of compound 8e.
